# Supplementary material for: Primate phylogenomics uncovers multiple rapid radiations and ancient interspecific introgression
Source: PubMed Central journal article supplement (PMC7738166; doi:10.1371/journal.pbio.3000954), 2020-12-03
Supplement: pbio.3000954.s001.pdf [file pbio.3000954.s001.pdf]

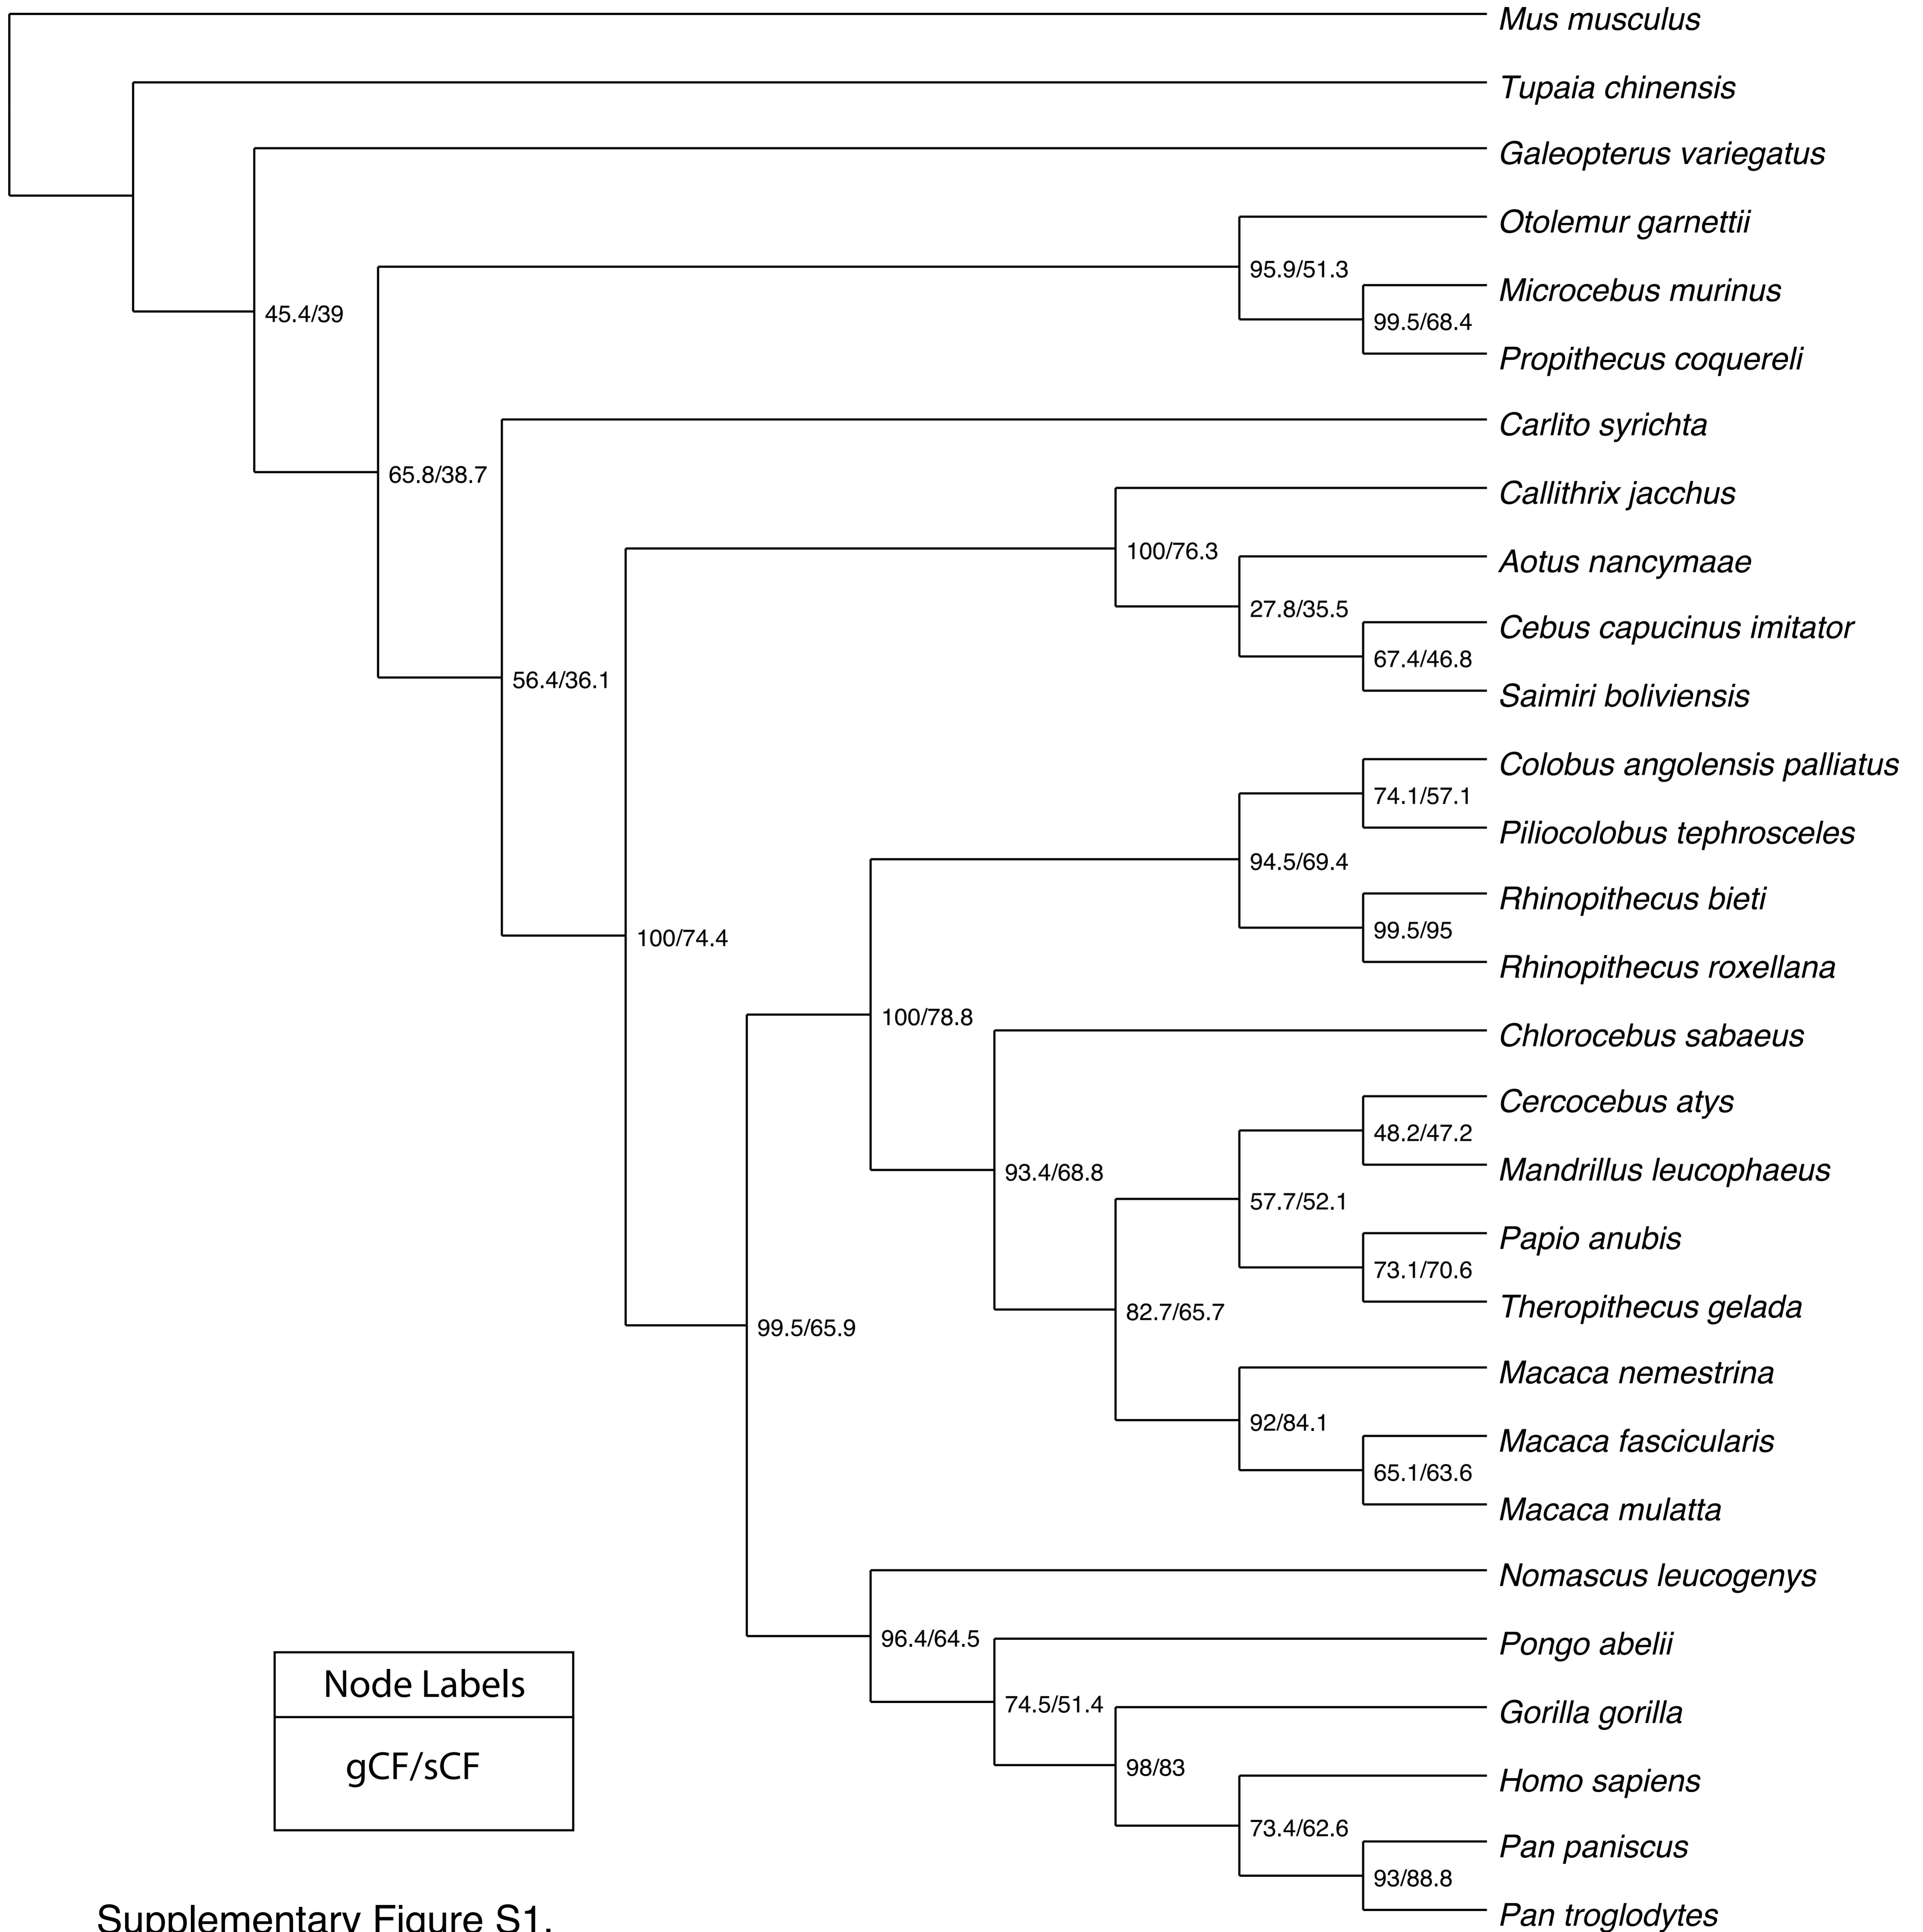

Supplementary Figure S1.
