# Supplementary material for: Primate phylogenomics uncovers multiple rapid radiations and ancient interspecific introgression
Source: PubMed Central journal article supplement (PMC7738166; doi:10.1371/journal.pbio.3000954), 2020-12-03
Supplement: pbio.3000954.s003.pdf [file pbio.3000954.s003.pdf]

# Concordance Factors vs. Node Depth

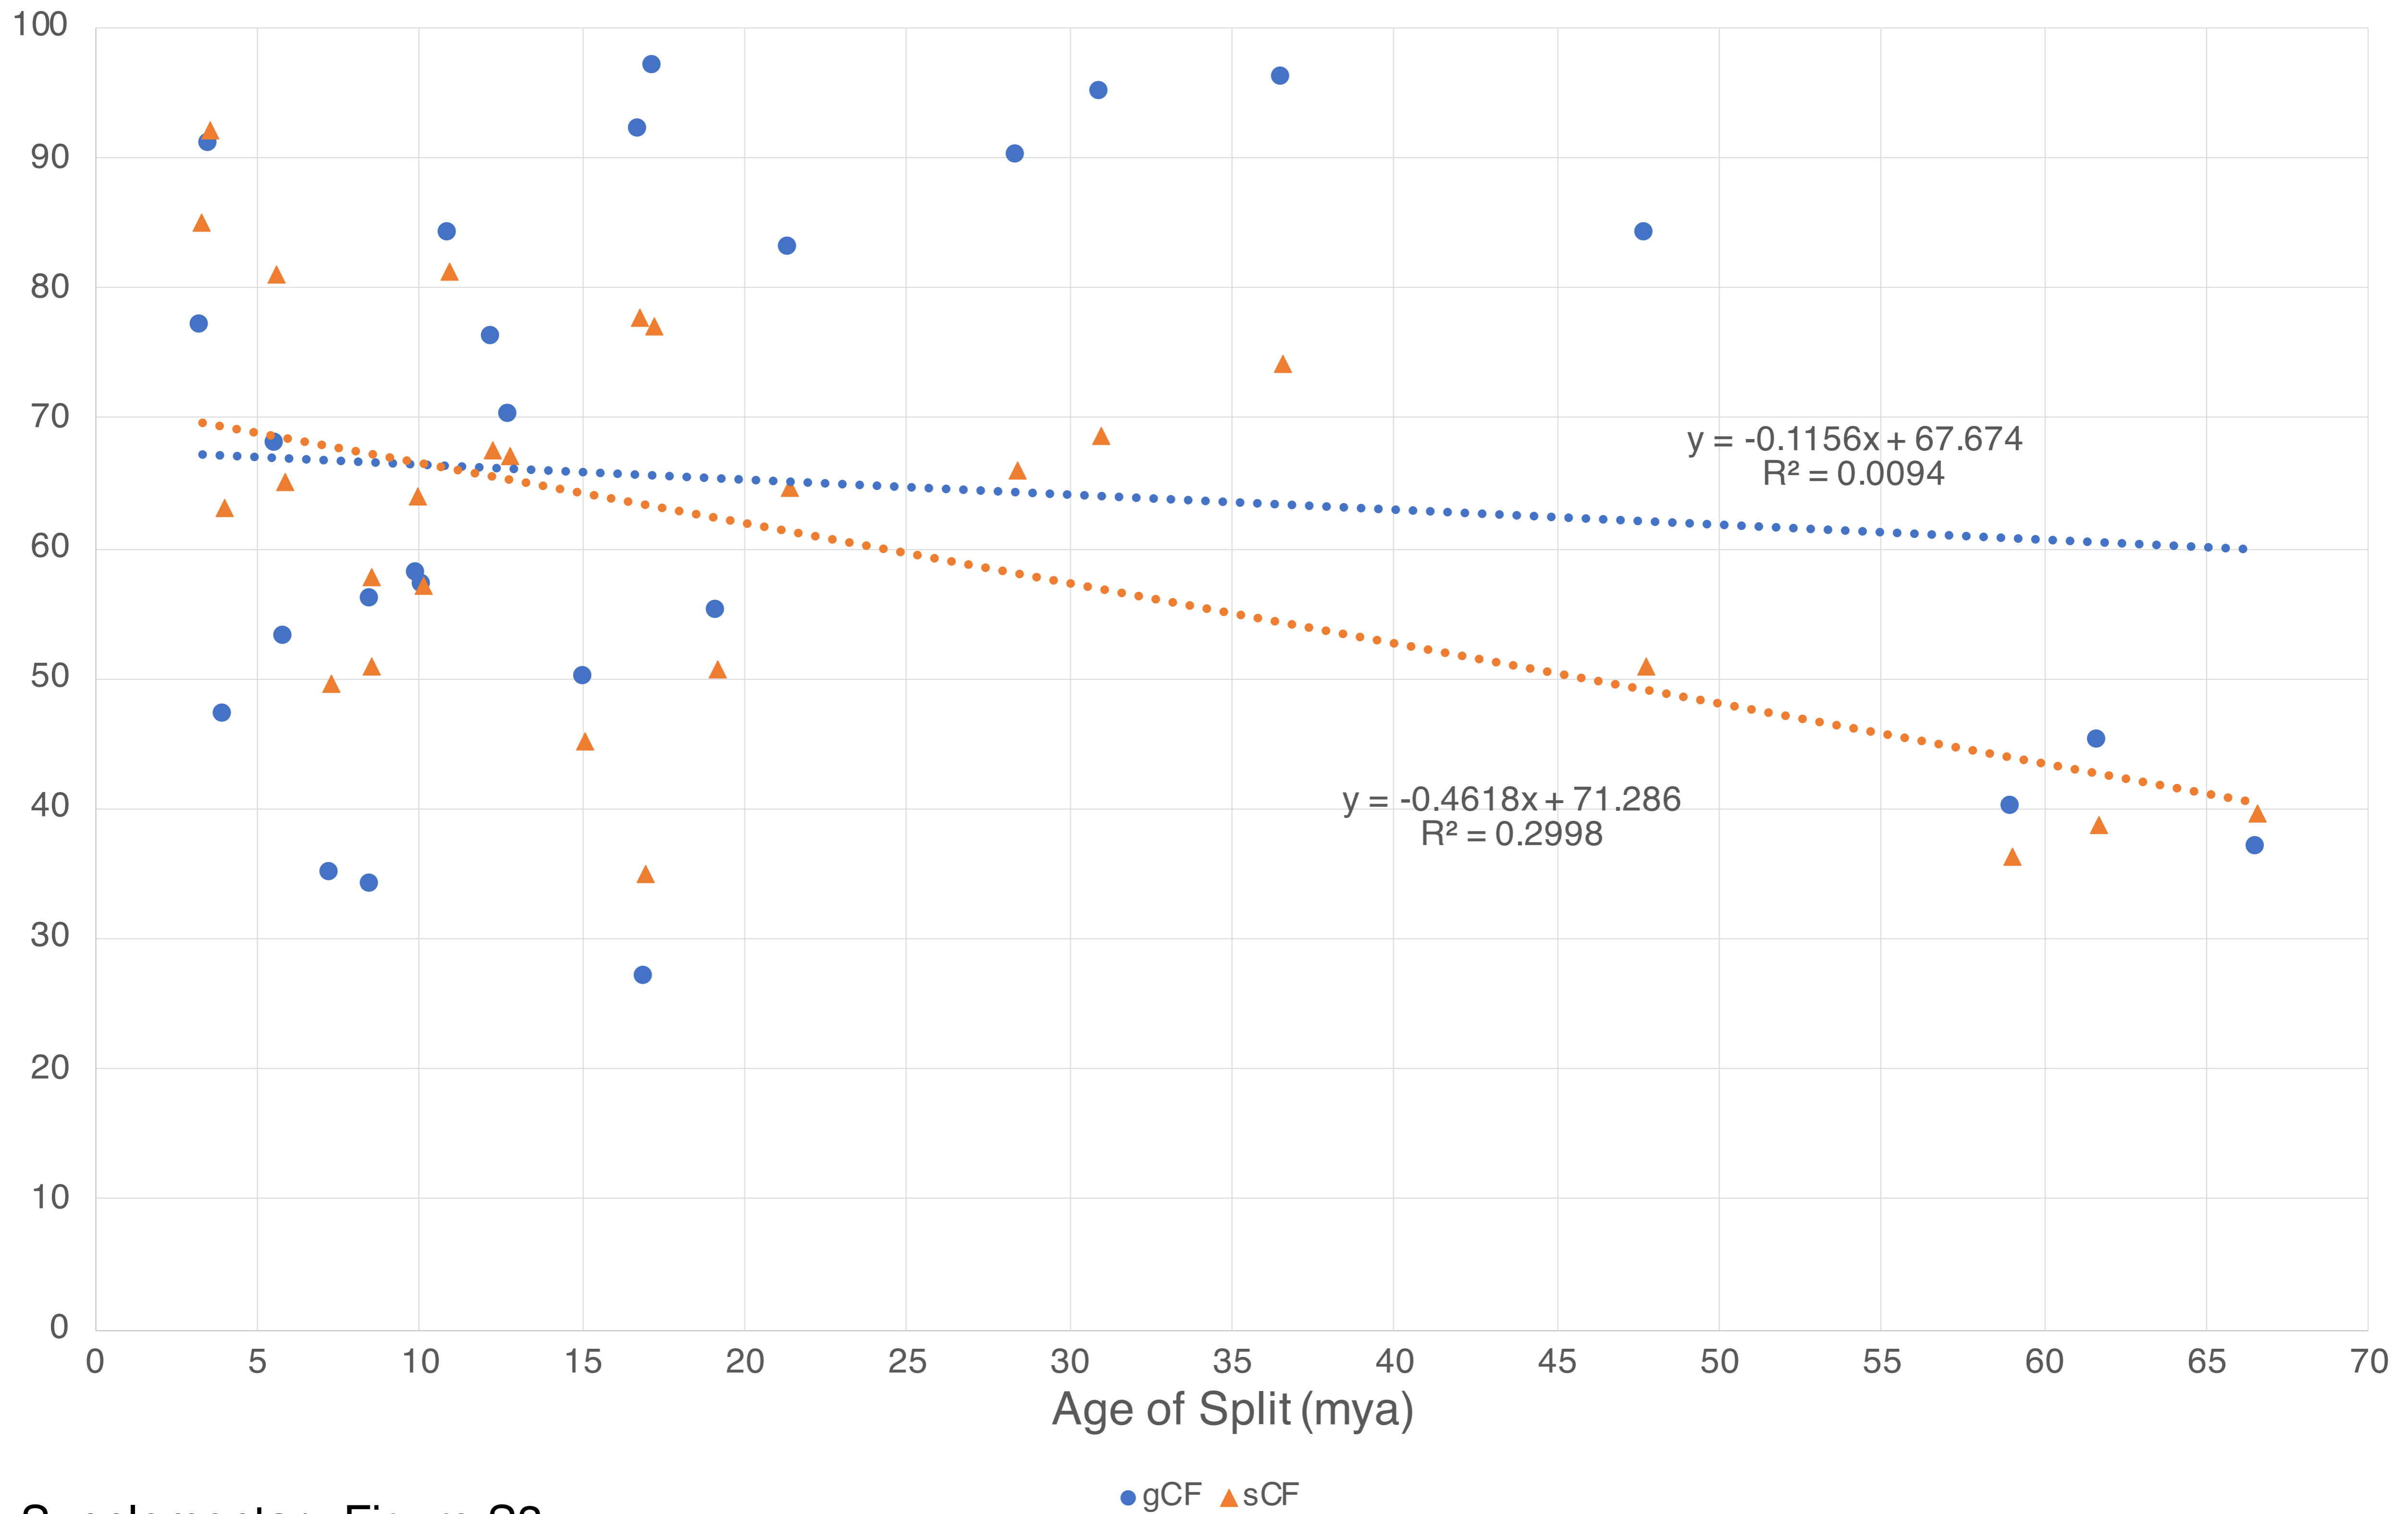

Supplementary Figure S3.
