# Supplementary material for: Primate phylogenomics uncovers multiple rapid radiations and ancient interspecific introgression
Source: PubMed Central journal article supplement (PMC7738166; doi:10.1371/journal.pbio.3000954), 2020-12-03

A) Per locus mutation rate =  $3 \times 10^{-7}$

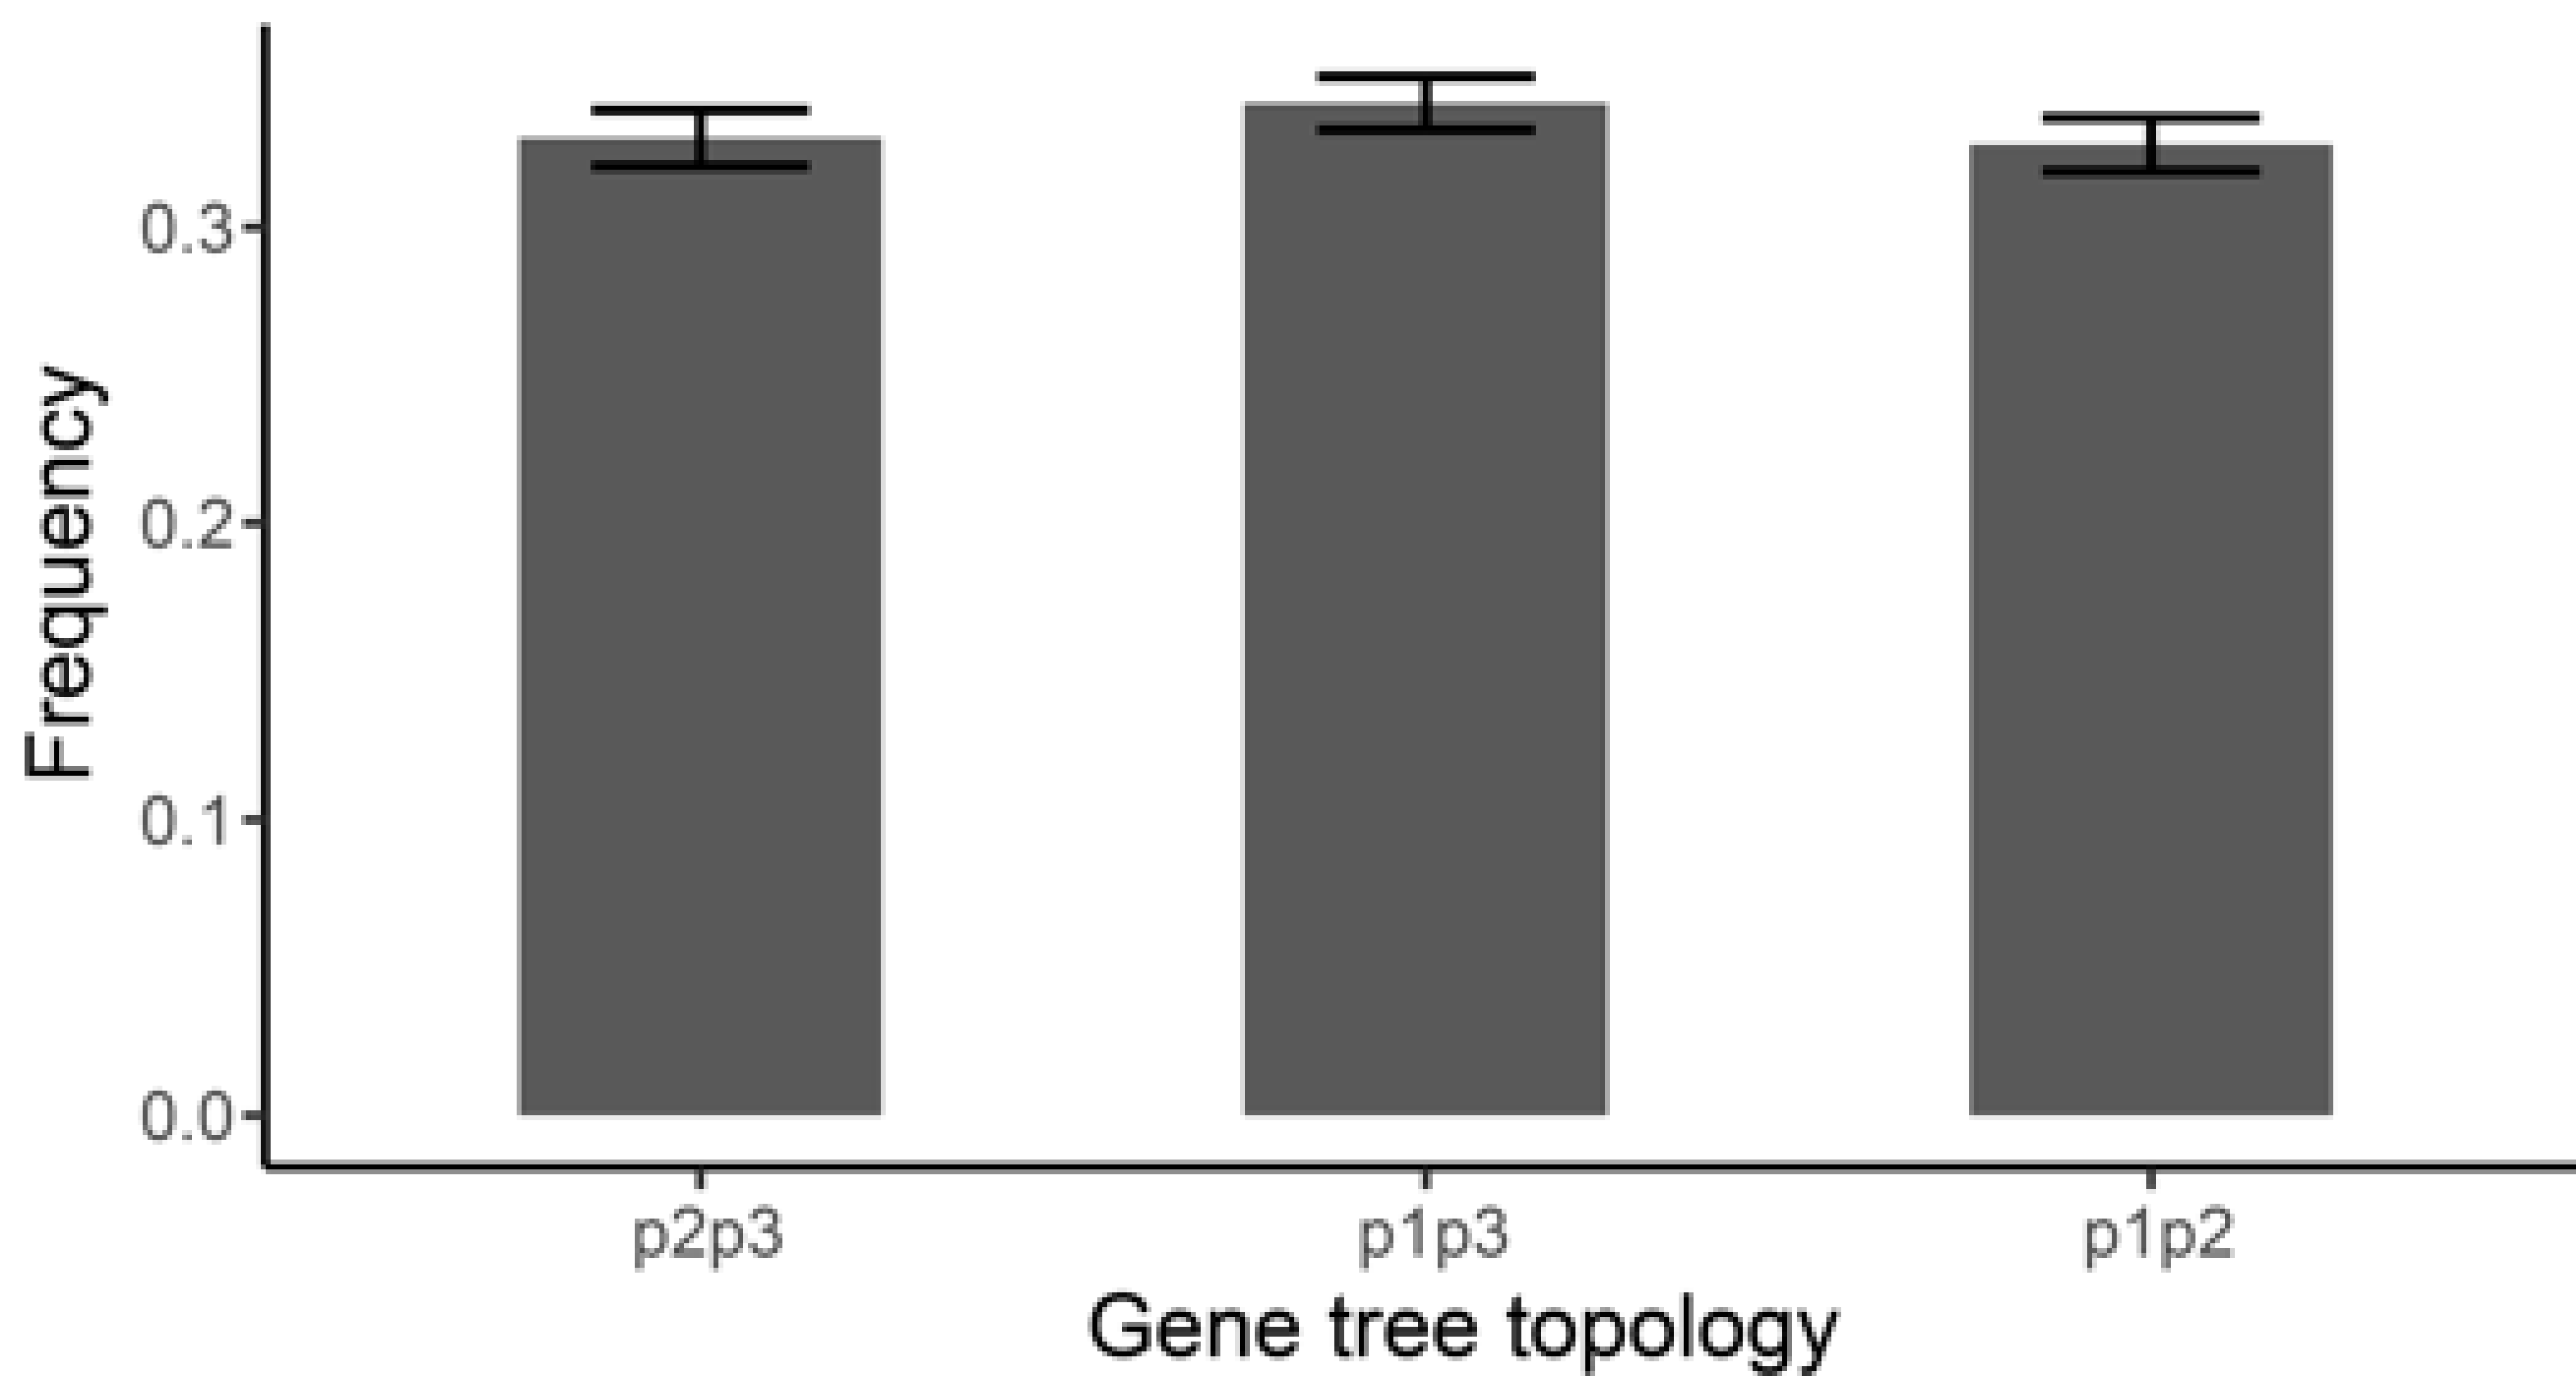

B) Per locus mutation rate =  $3 \times 10^{-5}$

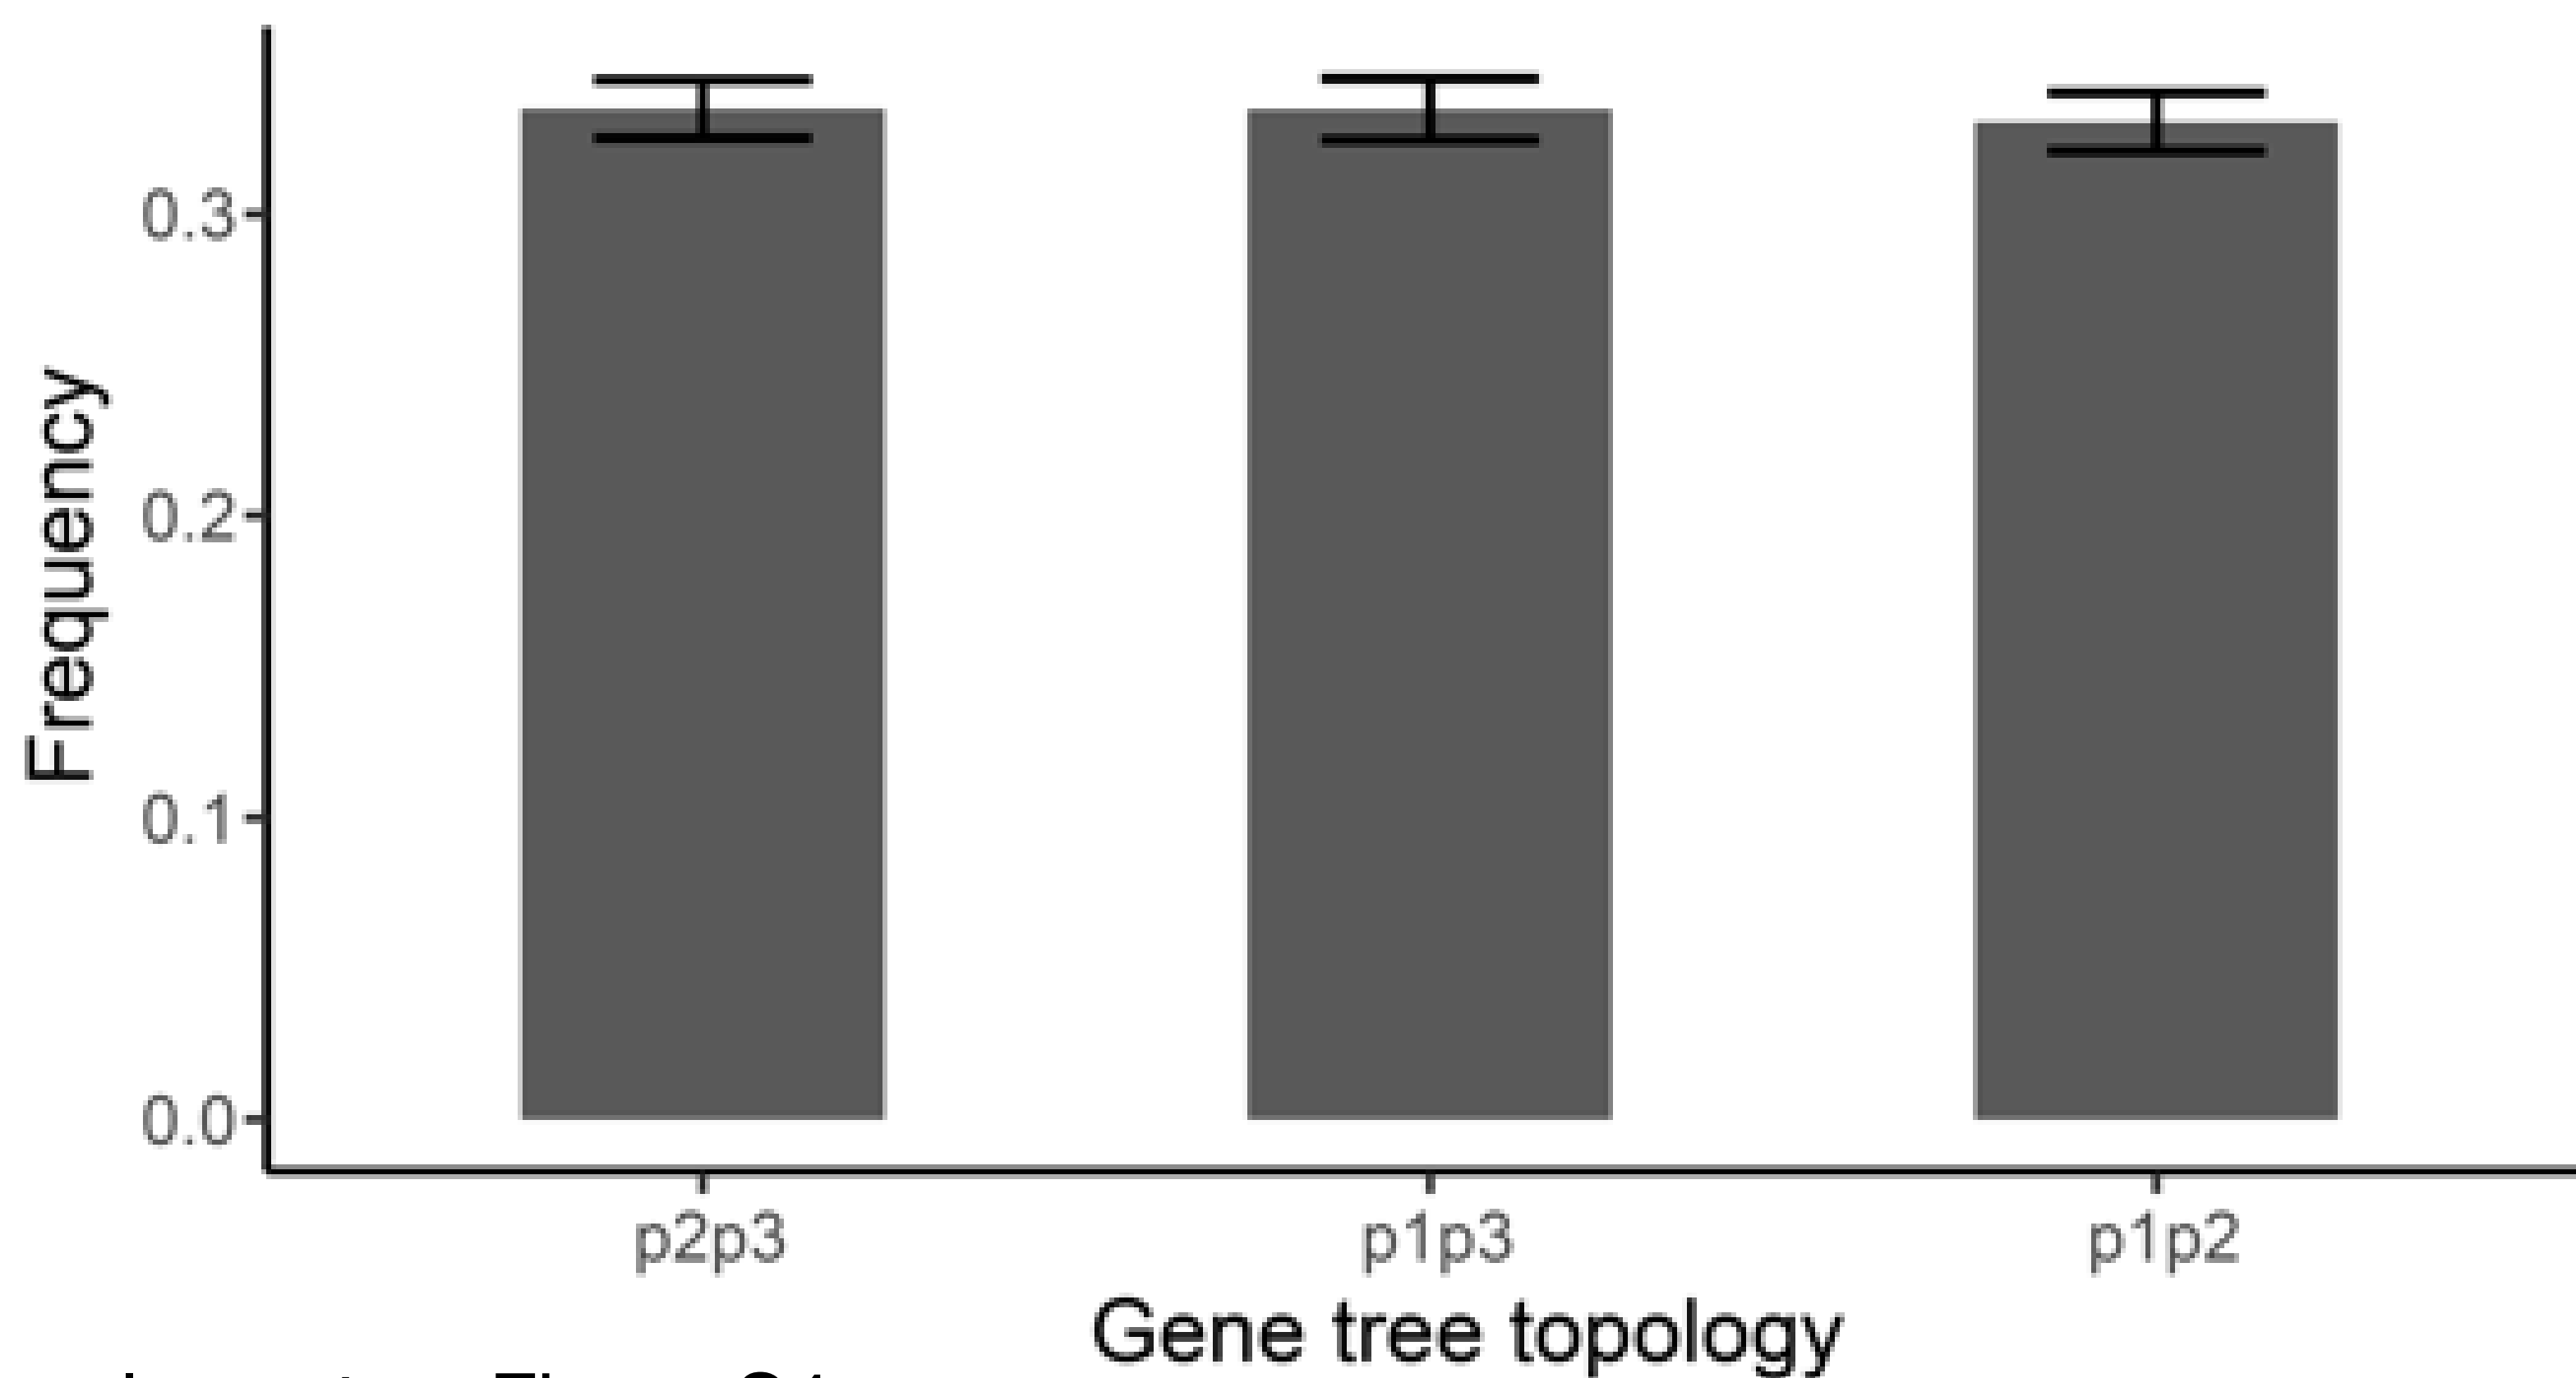

Supplement: pbio.3000954.s004.pdf [file pbio.3000954.s004.pdf]
